# Supplementary material
Source: HighWire-hosted journal article supplement (http://www.jrheum.org/highwire/filestream/35272/field_highwire_adjunct_files/0/181095DataSuppl.pdf)
Supplement: 181095DataSuppl.pdf [file 181095DataSuppl.pdf]

**ONLINE SUPPLEMENTARY DATA**

**Supplementary Table 1. EULAR-OMERACT\* combined scoring system for synovitis**

| Synovitis             | SH (greyscale)                                                                         | Doppler                                                                     | Combined score<br>(greyscale SH +PD)                                    |
|-----------------------|----------------------------------------------------------------------------------------|-----------------------------------------------------------------------------|-------------------------------------------------------------------------|
| Grade 0 (normal)<br>† | No SH irrespective of effusion                                                         | No signals                                                                  | No SH and no PD                                                         |
| Grade 1 (minimal)     | Minimal hypoechoic SH up to the imaginary horizontal line connecting the 2 joint edges | Up to three single signals or one confluent and two single or two confluent | Grade 1 SH and/or ≤ grade 1 PD                                          |
| Grade 2 (moderate)    | Moderate hypoechoic SH protruding over the joint line along with concave surface       | >Grade 1 but <50% of SH area covered by signals                             | Grade 2 SH and /or ≤ grade 2 PD ; or grade 1 SH and grade 2 PD          |
| Grade 3 (severe)      | Severe hypoechoic SH protruding beyond the joint line with convex surface              | >50% of SH area covered by signals                                          | Grade 3 SH and/or ≤ grade 3 PD; or grade 1 or grade 2 SH and grade 3 PD |

† Independently of the presence of effusion. \*EULAR-OMERACT, European League Against Rheumatism–Outcomes Measures in Rheumatology Clinical Trials; PD, power Doppler; SH, synovial hypertrophy

**Supplementary Table 2. OMERACT combined scoring system for enthesitis with semiquantitative Doppler grading**

|                              |     |
|------------------------------|-----|
| Doppler                      | 0-3 |
| Hypoechoogenicity            | 0/1 |
| Thickened enthesis           | 0/1 |
| Calcifications/enthesophytes | 0/1 |
| Bone erosions                | 0/1 |

|         |                                                                 |
|---------|-----------------------------------------------------------------|
| Grade 0 | 0 Doppler signal                                                |
| Grade 1 | < 2 punctiform Doppler signals with no confluent Doppler signal |
| Grade 2 | 2-4 punctiform Doppler signal or 1 confluent Doppler signal     |
| Grade 3 | > 4 punctiform Doppler signals or > 1 confluent Doppler signal  |

**Supplementary Table 3. OMERACT combined scoring system for tenosynovitis in B-mode and Doppler**

| B-mode                                                                                                                                                                   | Doppler mode (*)                                                                                                                                                                                 |
|--------------------------------------------------------------------------------------------------------------------------------------------------------------------------|--------------------------------------------------------------------------------------------------------------------------------------------------------------------------------------------------|
| Grade 0, normal; no tenosynovial widening either due to hypertrophy or effusion                                                                                          | No Doppler signal                                                                                                                                                                                |
| Grade 1; i.e. , minimal amount of anechoic or hypoechoic material within the tenosynovial sheath, either localised or displaceable, and seen in two perpendicular planes | Peritendinous focal signal within the widened synovial sheath (ie, signals in only one area of the widened sheath), seen in two perpendicular planes, excluding normal feeding vessels           |
| Grade 2; i.e., moderate amount of anechoic or hypoechoic material within the tenosynovial sheath                                                                         | Peritendinous multifocal signal within the widened synovial sheath (ie, signals in more than one area of the widened sheath), seen in two perpendicular planes, excluding normal feeding vessels |
| Grade 3; i.e., severe amount of anechoic or hypoechoic material within the tenosynovial sheath                                                                           | Peritendinous diffuse signal within the widened synovial sheath (ie, signals filling most of the widened sheath), seen in two perpendicular planes, excluding normal feeding vessels.            |

\* If in addition to an abnormal peritendinous (ie, intra-sheath) signal an abnormal intratendinous signal is present in two perpendicular planes (ie, excluding intratendinous small isolated signals that can correspond to normal feeding vessels detectable by US), then grades 1 and 2 would be increased by one point

**Supplementary Table 4. OMERACT grading of cartilage damage in osteoarthritis\***

| <b>Cartilage Grading</b> |                                                                                                                                                  |
|--------------------------|--------------------------------------------------------------------------------------------------------------------------------------------------|
| 0                        | Normal cartilage                                                                                                                                 |
| 1 (minimal)              | Loss of anechoic structure and/or focal thinning of cartilage layer OR irregularities and/or loss of sharpness of at least one cartilage margin  |
| 2 (moderate)             | Loss of anechoic structure and/or focal thinning of cartilage layer AND irregularities and/or loss of sharpness of at least one cartilage margin |
| 3 (severe)               | Focal absence or complete loss of cartilage layer                                                                                                |

\*For the grading of osteophytes, see Hammer HB, Iagnocco A, Mathiessen A, Filippucci E, Gandjbakhch F, Kortekaas MC, et al. Global ultrasound assessment of structural lesions in osteoarthritis: a reliability study by the OMERACT ultrasonography group on scoring cartilage and osteophytes in finger joints. *Ann Rheum Dis* 2016;75:402-7.

**Supplementary Table 5. OMERACT combined scoring system for synovitis in children**

|                     | <b>B-mode</b>                                                                                                                                                             | <b>Doppler</b>                                                                                                                                              |
|---------------------|---------------------------------------------------------------------------------------------------------------------------------------------------------------------------|-------------------------------------------------------------------------------------------------------------------------------------------------------------|
| <b>Grade</b>        |                                                                                                                                                                           |                                                                                                                                                             |
| <b>0</b>            | No signs of synovial effusion or synovial hypertrophy (ie. no joint recess enlargement/capsular distension).                                                              | Absence of color/power Doppler signal within synovial hypertrophy with or without detection of normal physiological Doppler signals.                        |
| <b>1 (mild)</b>     | Synovial effusion and/or synovial hypertrophy that leads to a mild change of the joint recess appearance (ie. mild joint recess enlargement/capsular distension).         | Detection of up to 3 single Doppler signals within the area of synovial hypertrophy with or without normal physiological Doppler signals.                   |
| <b>2 (moderate)</b> | Synovial effusion and/or synovial hypertrophy that leads to a moderate change of the joint recess appearance (ie. moderate joint recess enlargement/capsular distension). | Detection of more than 3 single Doppler signals but less than 30% of the area of synovial hypertrophy with or without normal physiological Doppler signals. |
| <b>3 (severe)</b>   | Synovial effusion and/or synovial hypertrophy that leads to a severe change of the joint recess appearance (ie. severe joint recess enlargement/capsular distension).     | Detection of Doppler signals at more than 30% of the area of synovial hypertrophy with or without normal physiological Doppler signals                      |

**Supplementary Table 6. OMERACT ultrasound definitions of calcium pyrophosphate deposits disease elementary lesions**

| <b>Structure</b>  | <b>Shape</b>                                                                                                       | <b>Echogenicity</b>                                                                                                                                                                                                                                        | <b>Localization</b>                           | <b>Behavior at Dynamic scanning</b>                                                                                           |
|-------------------|--------------------------------------------------------------------------------------------------------------------|------------------------------------------------------------------------------------------------------------------------------------------------------------------------------------------------------------------------------------------------------------|-----------------------------------------------|-------------------------------------------------------------------------------------------------------------------------------|
| Fibrocartilage    | deposits of variable shape                                                                                         | hyperechoic (similar to the bone cortex echogenicity)                                                                                                                                                                                                      | localized within the fibrocartilage structure | Remain fixed and move together with the fibrocartilage during dynamic assessment (i.e. joint movement and probe compression). |
| Hyaline cartilage | deposits varying in size and shape                                                                                 | hyperechoic (similar to the bone cortex echogenicity) that do not create posterior shadowing                                                                                                                                                               | Localized within the hyaline cartilage        | The deposits remain fixed and move together with the hyaline cartilage (i.e. joint movement and probe compression)            |
| Tendon            | multiple, linear (parallel to the tendon fibrillar structure and not in continuity with the bone profile) deposits | Hyperechoic (in relation to the tendon echogenicity), that generally not create posterior shadowing. The deposits maintain their high degree of echogenicity even at very low levels of gain and are not affected by anisotropy as the surrounding tendon. | Localized within the tendon                   | Remain fixed and move together with the tendon during movement and probe compression.                                         |
| Synovial fluid    | deposits of variable size (from punctuate to large)                                                                | hyperechoic (similar to the bone cortex echogenicity), that generally do not create posterior shadowing.                                                                                                                                                   | Localized within the synovial fluid           | Are mobile                                                                                                                    |

**Supplementary Table 7. OMERACT US definitions of normal and pathologic large arteries (temporal and axillary) and of elementary components**

|                                                              | <b>Temporal arteries</b>                                                                                                                                                                                                                                                                                                      | <b>Axillary arteries</b>                                                                                                                                                                                                                                                          |
|--------------------------------------------------------------|-------------------------------------------------------------------------------------------------------------------------------------------------------------------------------------------------------------------------------------------------------------------------------------------------------------------------------|-----------------------------------------------------------------------------------------------------------------------------------------------------------------------------------------------------------------------------------------------------------------------------------|
| Definition of US appearance of normal arteries               | Pulsating, compressible artery with anechoic lumen surrounded by mid-echoic to hyperechoic tissue. Using US equipment with high resolution, the intima-media complex presenting as a homogenous, hypoechoic- or anechoic echostructure delineated by two parallel hyperechoic margins (“double line pattern”) may be visible. | Pulsating, hardly compressible artery with anechoic lumen; the intima-media complex presents as a homogenous, hypoechoic or anechoic echostructure delineated by two parallel hyperechoic margins (“double line pattern”), which is surrounded by midechoic to hyperechoic tissue |
| Definition of US appearance of vasculitis – “halo sign”      | Homogenous, hypoechoic wall thickening, well delineated towards the luminal side, visible both, in longitudinal and transverse planes, most commonly concentric in transverse scans.                                                                                                                                          | Same as for temporal arteries                                                                                                                                                                                                                                                     |
| Definition of US appearance of vasculitis - compression sign | The thickened arterial wall remains visible upon compression; i.e. the echogenicity contrasts hypoechoic due to vasculitic vessel wall thickening in comparison to the mid- to hyperechoic surrounding tissue. vasculitic vessel wall thickening contrasts with the mid-echoic to hyperechoic surrounding tissue.             | The definition is not used for the axillary arteries                                                                                                                                                                                                                              |
